# Supplementary material for: Paper-based colorimetric chemosensor for highly sensitive and selective detection of Cd 2+ in water and food samples
Source: Royal Society of Chemistry journal article supplement (doi:10.1039/d5ay01326g), 2025-01-01
Supplement: d5ay01326g1.pdf [file d5ay01326g1.pdf]

## Supporting information for

### Paper-based colorimetric chemosensor for highly sensitive and selective detection of $\text{Cd}^{2+}$ in water and food samples

Seyed Hossein Mousavi<sup>a</sup>, Asadollah Mohammadi<sup>\*,b</sup>, Mohammad Ali Zanjanchi<sup>\*,a</sup>, Hadi Fallah

Moafi<sup>a</sup>

<sup>a</sup> Department of Inorganic Chemistry, Faculty of Chemistry, University of Guilan, Rasht, Iran

<sup>b</sup> Department of Applied Chemistry, Faculty of Chemistry, University of Guilan, Rasht, Iran

E-mail of corresponding authors: [zanjanchi@guilan.ac.ir](mailto:zanjanchi@guilan.ac.ir) (M.A. Zanjanchi) and

[a\\_mohammadi@guilan.ac.ir](mailto:a_mohammadi@guilan.ac.ir) (A. Mohammadi)

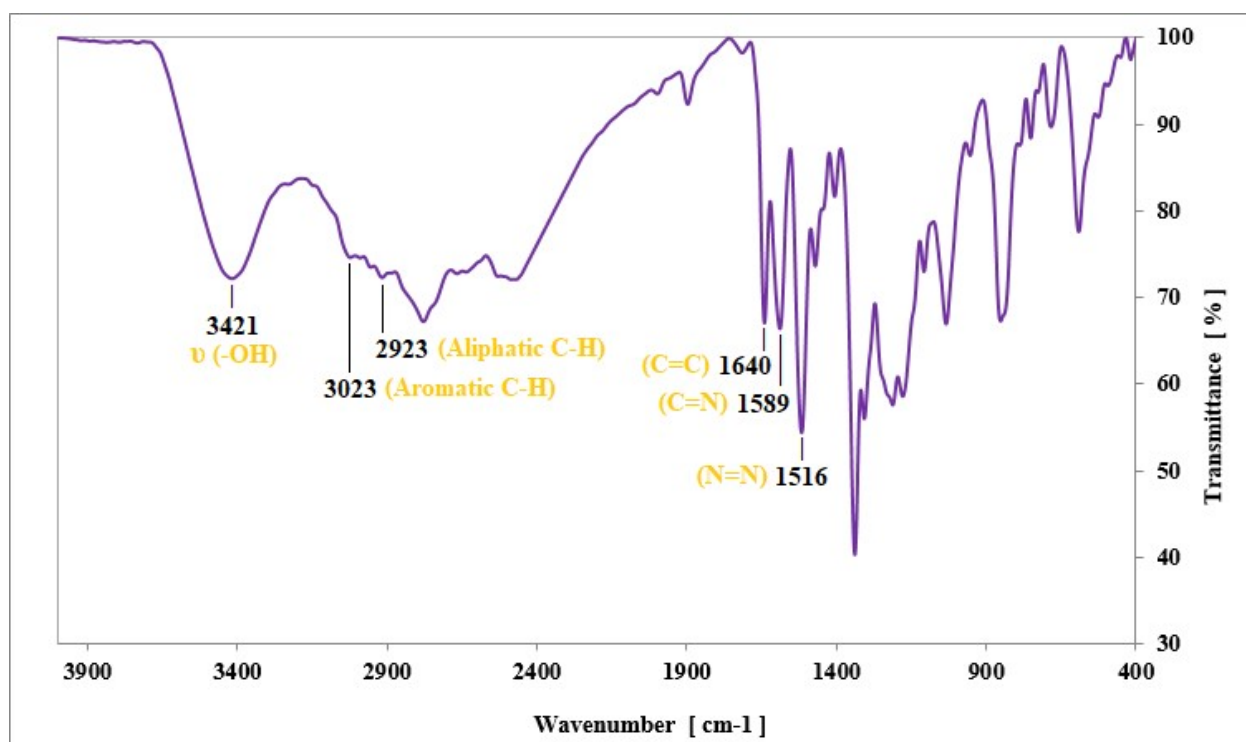

Figure S1. FT-IR spectra of the NAAMQ.

**Solvent effects on the sensing performance of the NAAMQ:** The effects of different solvents on the free NAAMQ and NAAMQ-Cd<sup>2+</sup> were investigated. The maximum absorbance of the free NAAMQ in DMSO, acetonitrile, methanol, ethanol, and DMF at  $\lambda_{\text{max}}$  of 421, 408, 429, 429, and 421 nm were equal to 1.25, 0.66, 0.87, 0.96, and 1.13, respectively. The maximum absorbance of the NAAMQ-Cd<sup>2+</sup> complex in DMSO, acetonitrile, methanol, ethanol, and DMF at  $\lambda_{\text{max}}$  of 545 nm were equal to 2.31, 1.93, 1.28, 1.50, and 2.12, respectively. Figure S3 (Supplementary data) shows UV-Vis spectra and color changes of the free NAAMQ and NAAMQ-Cd<sup>2+</sup> in various solvents at pH 7.0. According to the results, detect Cd<sup>2+</sup> cations by the NAAMQ in acetonitrile solvent was correlated with higher absorption intensity. Therefore, in colorimetric tests, the acetonitrile was used as the optimum solvent for the evaluation of the NAAMQ performance. Furthermore, according to Figure S4 (Supplementary data), using different ratios of acetonitrile/H<sub>2</sub>O (v/v) were led to assess the effect of solvent ratios on the sensing behavior of the NAAMQ for the detect Cd<sup>2+</sup> cations. According to the results, the detect Cd<sup>2+</sup> cations in acetonitrile/H<sub>2</sub>O solvent prepared with the ratios of 10:0, 9:1, 8:2, 7:3, 6:4, 5:5, and 4:6 was associated with a clear color change and higher absorption intensity in comparison with the other solvent ratios. Therefore, in all of the colorimetric measurements, the acetonitrile/H<sub>2</sub>O ratio of 6:4 (v/v) was chosen for the studies.

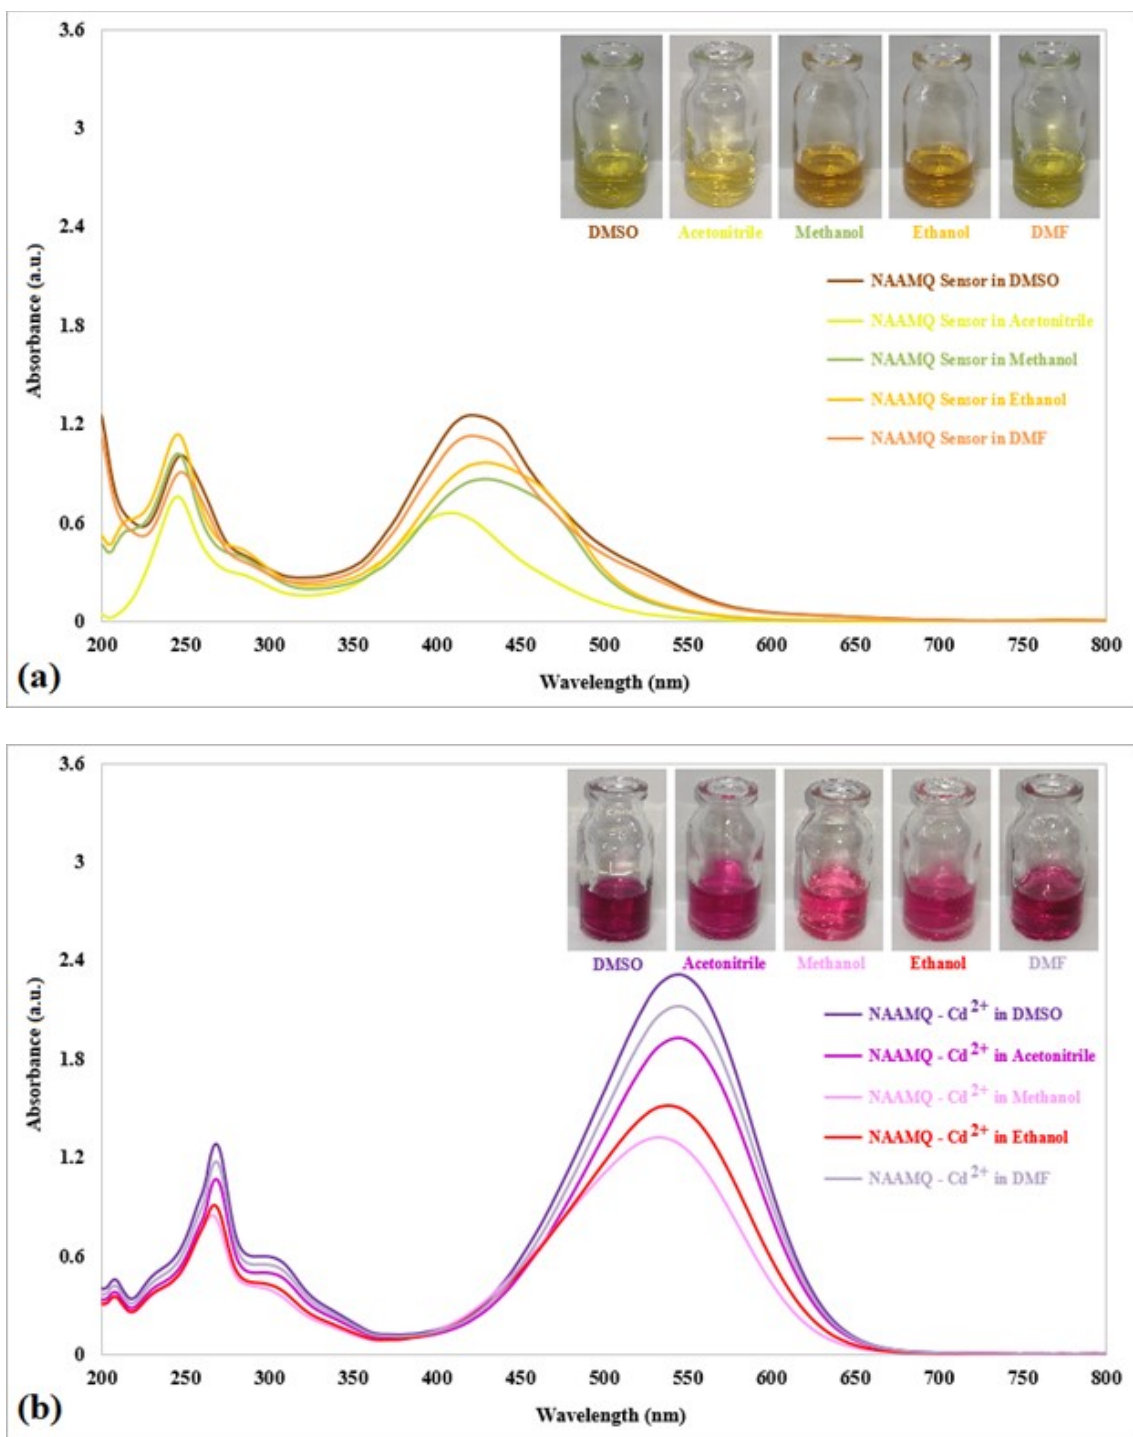

**Figure S2.** UV-Vis absorption spectrum and color changes of the free NAAMQ (a) and NAAMQ-Cd<sup>2+</sup> (b) in different solvents at pH of 7.0. (The final concentration of the sensor and Cd<sup>2+</sup>, 79 and 25  $\mu$ M, respectively)

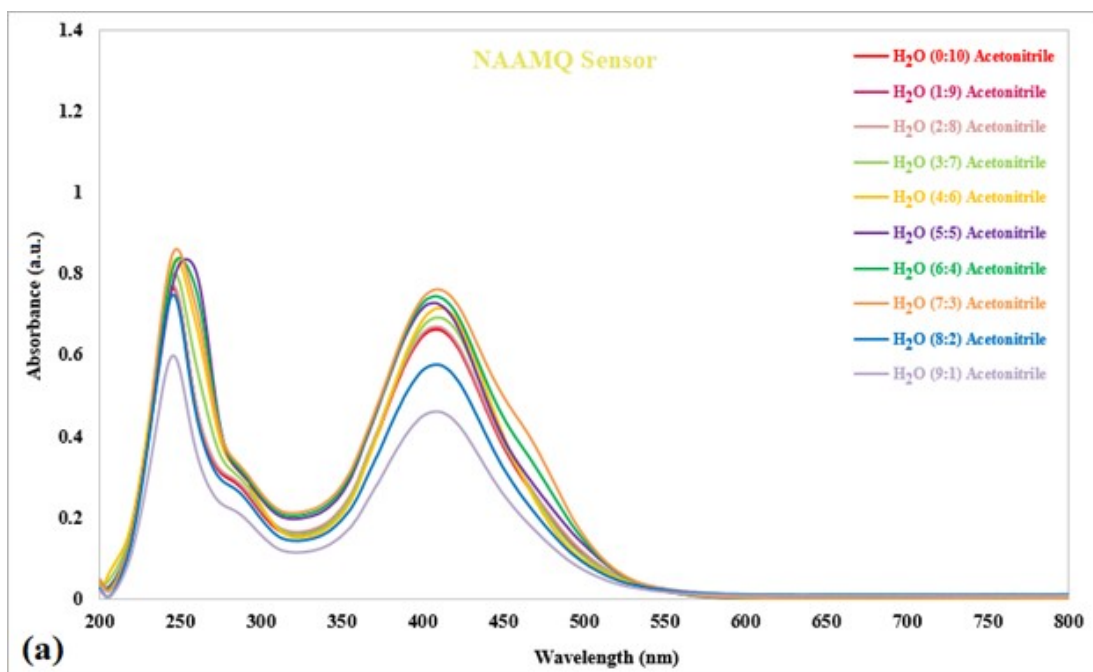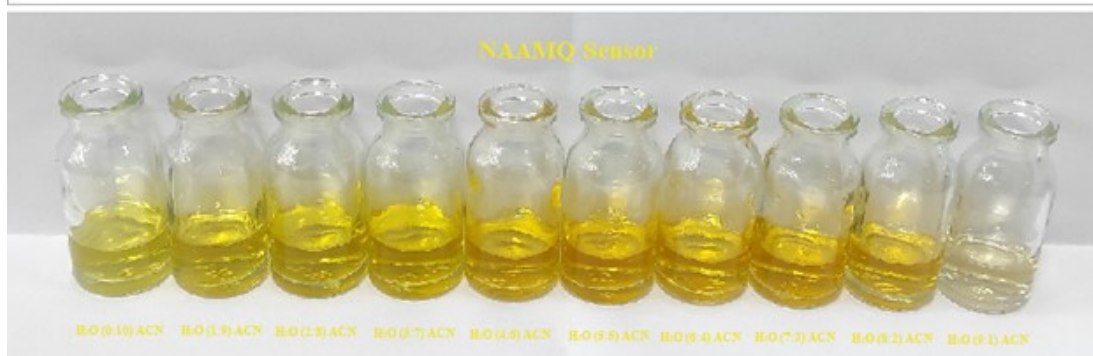

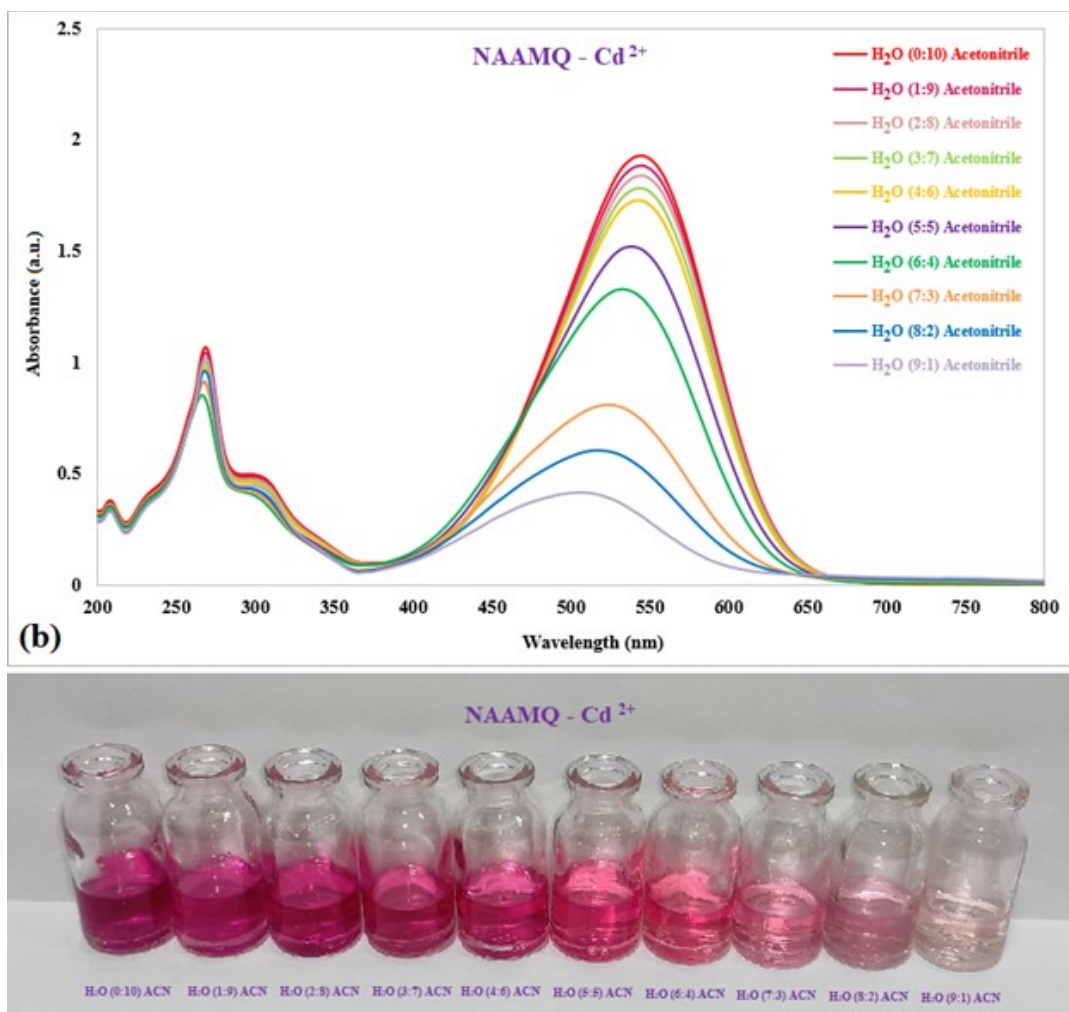

**Figure S3.** UV-Vis absorption spectrum and color changes of the free NAAMQ (a) and NAAMQ-Cd<sup>2+</sup> (b) in mixed H<sub>2</sub>O/acetonitrile (v/v) at pH of 7.0. (The final concentration of the sensor and Cd<sup>2+</sup>, 79 and 25  $\mu$ M, respectively)



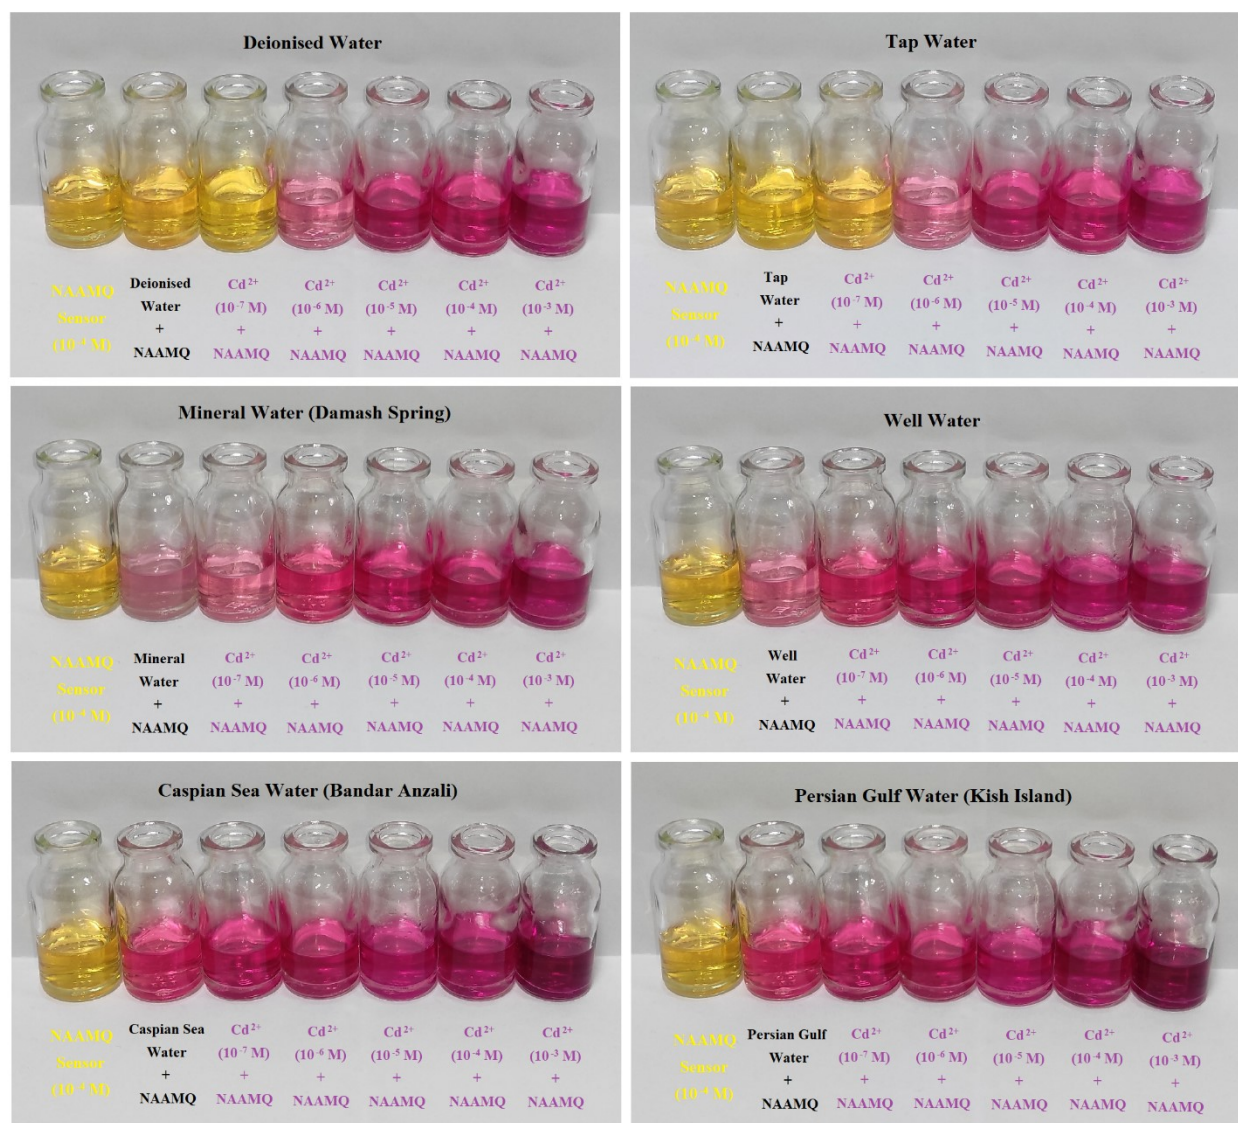

**Figure S4.** The color changes of the NAAMQ in acetonitrile/H<sub>2</sub>O (60:40, v/v) upon the addition of water samples and different concentrations of Cd<sup>2+</sup> ions at pH of 7.0.

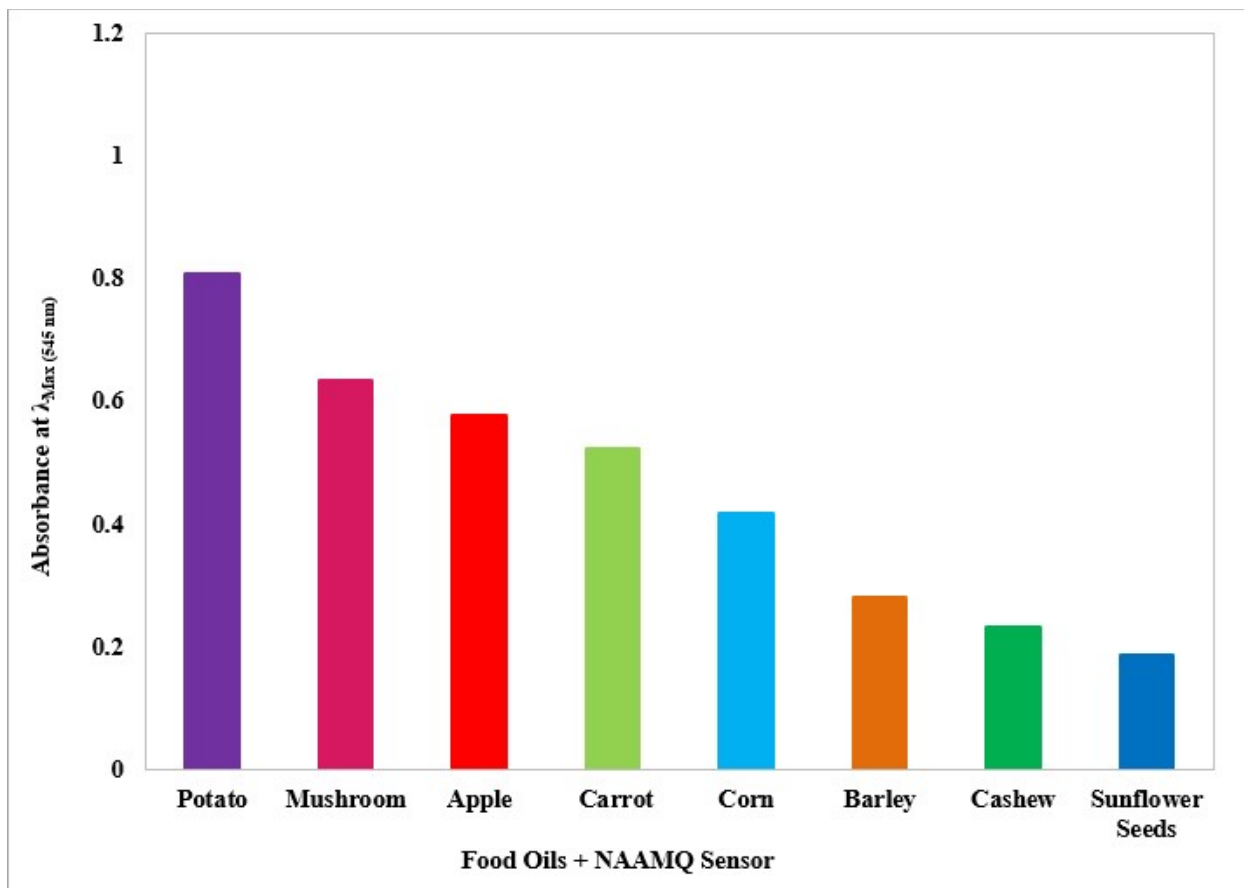

**Figure S5.** Absorption intensity of the NAAMQ for measure of  $\text{Cd}^{2+}$  ions in foodstuff samples (Acetonitrile/ $\text{H}_2\text{O}$  (60:40, v/v), pH = 7.0.).

**Equation S1:**

$$\frac{1}{A - A_0} = \left( \frac{1}{Ka[M]^n} \right) \times \frac{1}{A_{\max} - A_0} + \frac{1}{A_{\max} - A_0}$$

where A is the absorption of the NAAMQ- $\text{Cd}^{2+}$  complex at different concentrations of the  $\text{Cd}^{2+}$  cation at the maximum wavelength,  $A_0$  is the absorption of the sensor at the maximum wavelength,  $A_{\max}$  is the maximum absorption of the NAAMQ- $\text{Cd}^{2+}$  complex at the maximum wavelength, M is the  $\text{Cd}^{2+}$  cation concentration, Ka is the binding constant of the complex and n is a binding order.

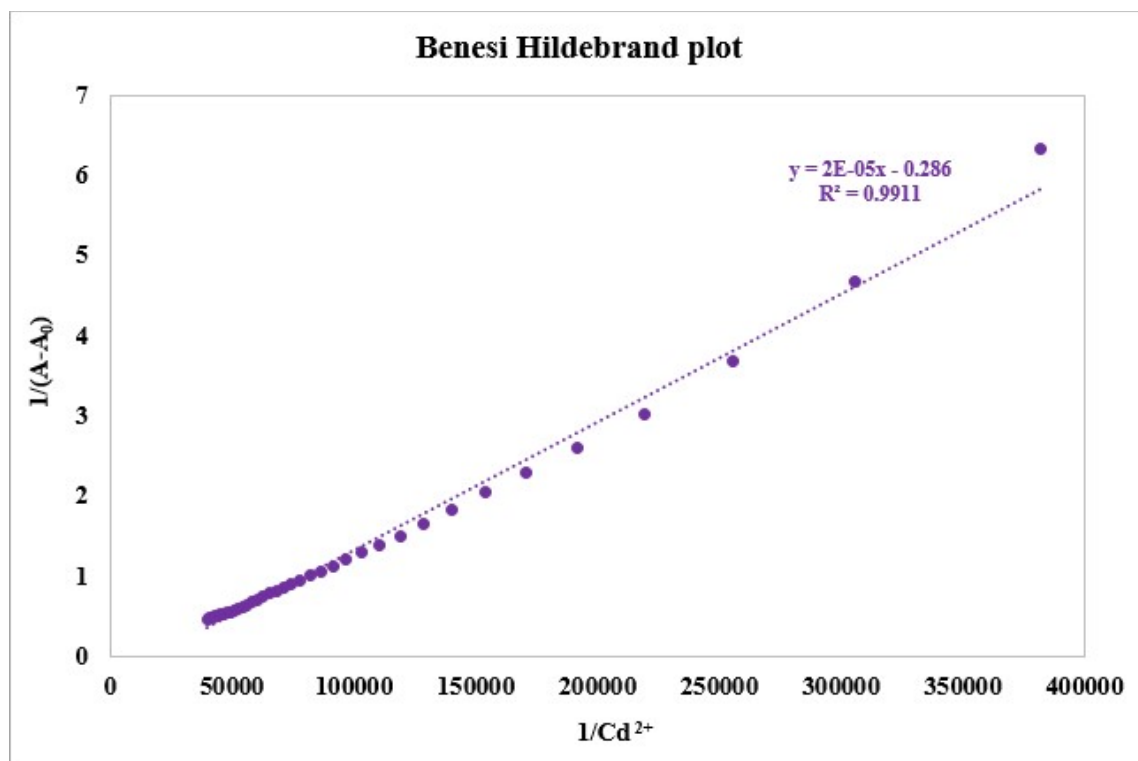

**Figure S6.** Benesi-Hildebrand plot of the NAAMQ- $Cd^{2+}$  complex.

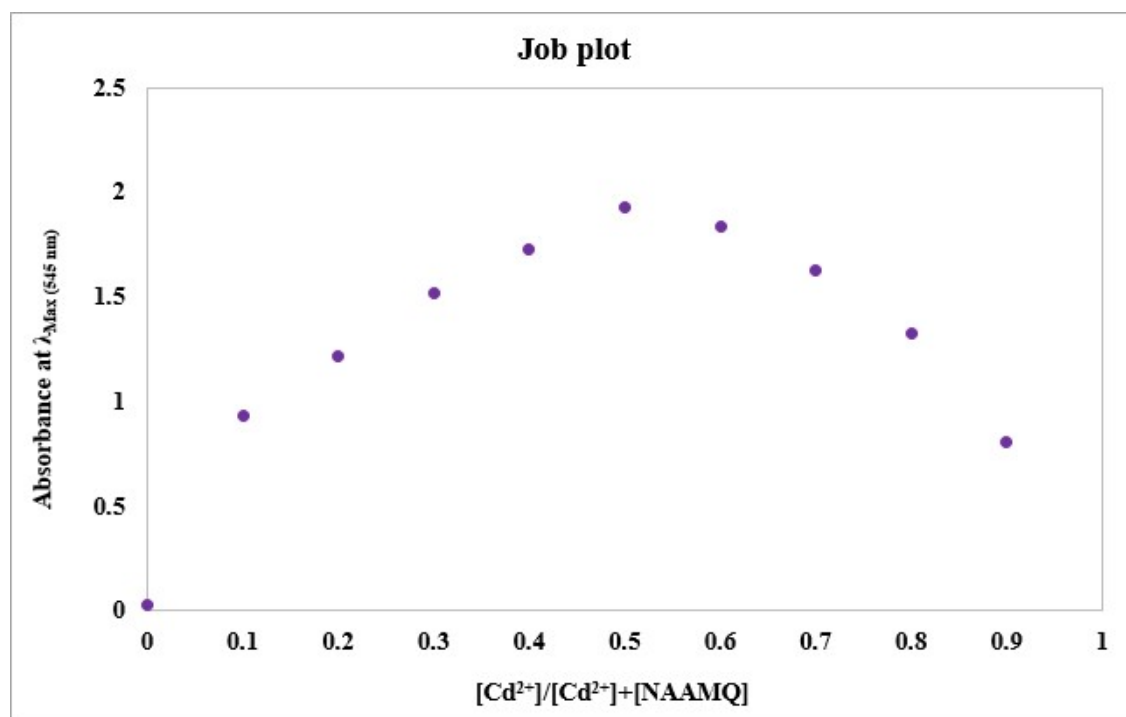

**Figure S7.** Job plot between NAAMQ and  $Cd^{2+}$  cation in acetonitrile/ $H_2O$  solution.
